# Supplementary material
Source: PubMed Central journal article supplement (PMC10775771)
Supplement: jmcp.2024.30.1.61_s001.pdf [file jmcp.2024.30.1.61_s001.pdf]

## **SUPPLEMENTARY MATERIALS**

### **Predictors of flare-related inpatient or emergency department stay in systemic lupus erythematosus: A real-world analysis of Medicaid claims in the United States**

Sandra Sze-jung Wu, PhD; Allison Perry, MHS; Nicole M. Zimmerman, MS; Gary Bryant, MD

**SUPPLEMENTARY FIGURE 1** Study Period Diagram

**SUPPLEMENTARY TABLE 1** SLE-Related Conditions

**SUPPLEMENTARY TABLE 2** Full Logistic Model Results

**SUPPLEMENTARY TABLE 3** All Demographics and Year 1 Characteristics

**Supplemental Figure 1. Study Period Diagram**

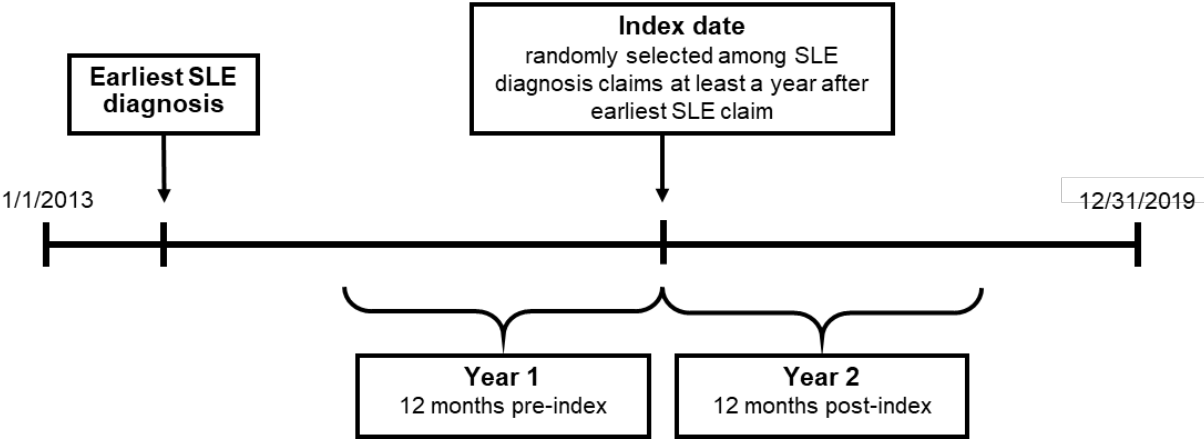

**Supplemental Table 1. SLE-related conditions**

|                                                                                |                               |
|--------------------------------------------------------------------------------|-------------------------------|
| Acute confusional state/psychosis                                              | Lupus enteritis/colitis       |
| Acute pancreatitis                                                             | Lymph node enlargement        |
| Aortitis                                                                       | Mononeuropathy/polyneuropathy |
| Arterial/venous thrombosis                                                     | Myalgia/myositis              |
| Arthritis/arthralgia                                                           | Myelopathy                    |
| Aseptic meningitis                                                             | Myocarditis                   |
| Cardiac tamponade                                                              | Nephritis                     |
| Chorioretinitis                                                                | Optic neuritis                |
| Cranial neuropathy                                                             | Pericarditis                  |
| Demyelinating syndrome/acute inflammatory demyelinating polyradiculoneuropathy | Pleurisy/pleural effusion     |
| Dry eye/tear film insufficiency                                                | Pseudotumor cerebri           |
| End stage renal disease                                                        | Pulmonary hemorrhage          |
| Episcleritis/scleritis                                                         | Rash                          |
| Hemolytic anemia                                                               | Renal impairment              |
| Hepatitis                                                                      | Seizure                       |
| Intestinal pseudo-obstruction                                                  | Stroke/TIA                    |
| Ischemic necrosis of bone                                                      | Uveitis vasculitis            |
| Low white blood cell count                                                     |                               |

**Supplemental Table 2.** Full logistic model results

| <b>Predictor</b>                                           | <b>OR (95% CI)</b>        | <b>p-value</b>   |
|------------------------------------------------------------|---------------------------|------------------|
| Intercept                                                  | <b>0.13 (0.10 - 0.17)</b> | <b>&lt;0.001</b> |
| Age (per year increase)                                    | <b>0.99 (0.98 - 0.99)</b> | <b>&lt;0.001</b> |
| Sex - Male vs. Female                                      | 0.85 (0.69 - 1.05)        | 0.123            |
| Race - Black vs. White                                     | <b>1.49 (1.32 - 1.68)</b> | <b>&lt;0.001</b> |
| Race - Other vs. White                                     | 1.13 (0.97 - 1.33)        | 0.125            |
| Population Density - Rural vs. Urban/Unknown               | 0.98 (0.87 - 1.11)        | 0.751            |
| Insurance Plan Type - Comprehensive/Indemnity vs. HMO      | 1.08 (0.95 - 1.22)        | 0.246            |
| Insurance Plan Type - Other vs. HMO                        | 0.44 (0.14 - 1.43)        | 0.175            |
| Cancer                                                     | 0.96 (0.73 - 1.27)        | 0.782            |
| Chronic pulmonary disease                                  | <b>1.17 (1.04 - 1.31)</b> | <b>0.010</b>     |
| Coagulopathy                                               | 0.95 (0.73 - 1.23)        | 0.677            |
| Congestive heart failure                                   | 0.95 (0.77 - 1.18)        | 0.666            |
| Deficiency anemia                                          | 1.13 (1.00 - 1.28)        | 0.054            |
| Depression                                                 | <b>1.24 (1.10 - 1.40)</b> | <b>&lt;0.001</b> |
| Diabetes                                                   | 0.88 (0.77 - 1.02)        | 0.084            |
| Drug abuse                                                 | <b>1.22 (1.05 - 1.43)</b> | <b>0.010</b>     |
| Fluid and electrolyte disorders                            | <b>1.26 (1.10 - 1.45)</b> | <b>0.001</b>     |
| Hypertension                                               | <b>1.25 (1.09 - 1.43)</b> | <b>0.001</b>     |
| Hypothyroidism                                             | 0.95 (0.81 - 1.11)        | 0.482            |
| Liver disease                                              | 0.97 (0.77 - 1.22)        | 0.766            |
| Obesity                                                    | 1.00 (0.89 - 1.13)        | 0.970            |
| Other neurological disorders                               | <b>1.63 (1.43 - 1.87)</b> | <b>&lt;0.001</b> |
| Peripheral vascular disorders                              | <b>1.32 (1.06 - 1.66)</b> | <b>0.013</b>     |
| Chronic Kidney Disease or Renal Failure                    | <b>1.35 (1.10 - 1.66)</b> | <b>0.004</b>     |
| Anxiety                                                    | 1.07 (0.95 - 1.20)        | 0.292            |
| Atherosclerosis                                            | 1.04 (0.83 - 1.30)        | 0.735            |
| Cerebrovascular disease, stroke, or TIA                    | 1.01 (0.84 - 1.21)        | 0.912            |
| Endocarditis                                               | 1.18 (0.99 - 1.41)        | 0.066            |
| Myocardial infarction                                      | 1.27 (0.95 - 1.70)        | 0.109            |
| Pericarditis                                               | 1.14 (0.82 - 1.58)        | 0.425            |
| Fibromyalgia                                               | <b>1.14 (1.01 - 1.28)</b> | <b>0.039</b>     |
| Fractures                                                  | 1.16 (0.94 - 1.43)        | 0.162            |
| Kidney Transplant                                          | 1.64 (0.87 - 3.09)        | 0.128            |
| Lupus Nephritis                                            | 1.01 (0.82 - 1.24)        | 0.926            |
| Osteoarthritis                                             | 1.10 (0.97 - 1.24)        | 0.158            |
| Osteoporosis                                               | 0.93 (0.74 - 1.17)        | 0.559            |
| Pleurisy/Pleural Effusion                                  | 1.05 (0.83 - 1.32)        | 0.708            |
| Raynaud's Disease                                          | 0.95 (0.77 - 1.17)        | 0.629            |
| Thrombocytopenia                                           | 1.10 (0.81 - 1.50)        | 0.532            |
| Antidepressants                                            | 1.01 (0.89 - 1.14)        | 0.884            |
| Antihypertensives                                          | <b>0.87 (0.77 - 1.00)</b> | <b>0.044</b>     |
| Opioids                                                    | <b>1.30 (1.17 - 1.45)</b> | <b>&lt;0.001</b> |
| Number of flares (per number increase)                     | <b>1.19 (1.15 - 1.22)</b> | <b>&lt;0.001</b> |
| SLE-treatment progression: Antimalarial only vs. none      | <b>0.68 (0.60 - 0.78)</b> | <b>&lt;0.001</b> |
| SLE-treatment progression: Immunosuppressant vs. none      | <b>0.59 (0.51 - 0.68)</b> | <b>&lt;0.001</b> |
| SLE-treatment progression: Biologic vs. none               | <b>0.54 (0.42 - 0.70)</b> | <b>&lt;0.001</b> |
| Cumulative oral corticosteroid dosage (per 100mg increase) | 1.00 (1.00 - 1.01)        | 0.071            |
| Any systemic corticosteroid                                | 1.12 (1.01 - 1.25)        | 0.039            |
| Any inpatient admission                                    | <b>1.26 (1.10 - 1.43)</b> | <b>0.001</b>     |
| Any ER visit                                               | <b>2.19 (1.93 - 2.49)</b> | <b>0.000</b>     |
| Total healthcare costs (per 10% increase)                  | 1.00 (1.00 - 1.00)        | 0.913            |

**Supplemental Table 3.** All demographics and Year 1 characteristics

|                                                | All Patients |      |
|------------------------------------------------|--------------|------|
|                                                | N = 8,083    |      |
| <b>Demographic Characteristics<sup>1</sup></b> |              |      |
| Age (Mean, SD)                                 | 40.9         | 12.3 |
| Median                                         | 40.0         | N/A  |
| Sex (N, %)                                     |              |      |
| Male                                           | 546          | 6.8  |
| Female                                         | 7,537        | 93.3 |
| Race (N, %)                                    |              |      |
| White                                          | 3,097        | 38.3 |
| Black                                          | 3,794        | 46.9 |
| Other                                          | 1,192        | 14.7 |
| Urbanicity (N, %)                              |              |      |
| Urban                                          | 6,312        | 78.1 |
| Rural                                          | 1,771        | 21.9 |
| Insurance plan type (N, %)                     |              |      |
| Comprehensive/indemnity                        | 3,279        | 40.6 |
| HMO                                            | 4,783        | 59.2 |
| Other                                          | 21           | 0.3  |
| <b>Clinical Characteristics<sup>2</sup></b>    |              |      |
| ECI Conditions (N,%)                           |              |      |
| AIDS/HIV                                       | 42           | 0.5  |
| Alcohol abuse                                  | 294          | 3.6  |
| Blood loss anemia                              | 241          | 3.0  |
| Chronic pulmonary disease                      | 1,937        | 24.0 |
| Coagulopathy                                   | 760          | 9.4  |
| Congestive heart failure                       | 545          | 6.7  |
| Deficiency anemia                              | 2,106        | 26.1 |

|                                                 |       |      |
|-------------------------------------------------|-------|------|
| Depression                                      | 2,809 | 34.8 |
| Diabetes, complicated                           | 707   | 8.7  |
| Diabetes, uncomplicated                         | 668   | 8.3  |
| Drug abuse                                      | 985   | 12.2 |
| Fluid and electrolyte disorders                 | 1,627 | 20.1 |
| Hypertension, complicated                       | 1,004 | 12.4 |
| Hypertension, uncomplicated                     | 3,221 | 39.8 |
| Hypothyroidism                                  | 977   | 12.1 |
| Liver disease                                   | 385   | 4.8  |
| Lymphoma                                        | 43    | 0.5  |
| Metastatic cancer                               | 34    | 0.4  |
| Obesity                                         | 1,982 | 24.5 |
| Other neurological disorders                    | 1,387 | 17.2 |
| Paralysis                                       | 204   | 2.5  |
| Peptic ulcer disease, excluding bleeding        | 101   | 1.2  |
| Peripheral vascular disorders                   | 466   | 5.8  |
| Psychoses                                       | 1,443 | 17.9 |
| Pulmonary circulation disorders                 | 297   | 3.7  |
| Renal failure                                   | 840   | 10.4 |
| Rheumatoid arthritis/collagen vascular diseases | 7,325 | 90.6 |
| Solid tumour without metastasis                 | 201   | 2.5  |
| Valvular disease                                | 729   | 9.0  |
| Weight loss                                     | 444   | 5.5  |
| SLE-Related Comorbidities (N, %) <sup>4</sup>   |       |      |
| Anxiety                                         | 2,816 | 34.8 |
| Atherosclerosis                                 | 546   | 6.8  |
| Cerebrovascular disease <sup>5</sup>            | 719   | 8.9  |
| Stroke/TIA                                      | 521   | 6.4  |
| Endocarditis                                    | 774   | 9.6  |

|                             |       |      |
|-----------------------------|-------|------|
| Myocardial infarction       | 283   | 3.5  |
| Pericarditis                | 206   | 2.5  |
| Chronic Kidney Disease      | 1,093 | 13.5 |
| Fibromyalgia                | 2,040 | 25.2 |
| Fractures                   | 455   | 5.6  |
| Kidney Transplant           | 50    | 0.6  |
| Lupus Nephritis             | 1,207 | 14.9 |
| Osteoarthritis              | 1,916 | 23.7 |
| Osteoporosis                | 440   | 5.4  |
| Pleurisy/Pleural Effusion   | 396   | 4.9  |
| Raynaud's Disease           | 495   | 6.1  |
| Thrombocytopenia            | 500   | 6.2  |
| Number of flares (Mean, SD) | 3.9   | 2.0  |

### **Treatment Characteristics<sup>2</sup>**

#### SLE treatments (N, %)

|                                                       |       |       |
|-------------------------------------------------------|-------|-------|
| Antimalarials                                         | 4,460 | 55.2  |
| Biologics                                             | 397   | 4.9   |
| Immunosuppressants                                    | 2,609 | 32.3  |
| Systemic corticosteroids                              | 2,907 | 36.0  |
| Cumulative OCS dose <sup>6</sup> in 100 mg (Mean, SD) | 9.15  | 17.32 |

#### Most advanced SLE treatments (N, %)

|                                                      |       |      |
|------------------------------------------------------|-------|------|
| No antimalarial, immunosuppressant, or biologic use  | 2,905 | 35.9 |
| Antimalarial (without immunosuppressant or biologic) | 2,454 | 30.4 |
| Immunosuppressant (without biologic use)             | 2,327 | 28.8 |
| Biologic                                             | 397   | 4.9  |

#### Concomitant medications (N, %)

|                   |       |      |
|-------------------|-------|------|
| Antidepressants   | 4,220 | 52.2 |
| Antihypertensives | 4,539 | 56.2 |
| Opioids           | 4,148 | 51.3 |

## All-cause healthcare utilization and costs<sup>2</sup>

|                                      |          |          |
|--------------------------------------|----------|----------|
| Patients with an IP admission (N, %) | 2,128    | 26.3     |
| Patients with an ER visit (N, %)     | 5,649    | 69.9     |
| Total healthcare costs (Mean, SD)    | \$19,996 | \$59,337 |

CDHP: consumer-driven health plan; ECI: Elixhauser Comorbidity Index; EPO: exclusive provider organization; ER: emergency room; HDHP: high deductible health plan; HMO: health maintenance organization; IP: inpatient; N/A: not available; OCS: oral corticosteroid; POS: point of service; PPO: preferred provider organization; SD: standard deviation; SLE: systemic lupus erythematosus; TIA: transient ischemic attack

<sup>1</sup>Demographic characteristics were measured on the index date.

<sup>2</sup>Clinical characteristics, treatment characteristics, and healthcare utilization and costs were measured during the 12-month period prior to the index date.

<sup>3</sup>Other neurological conditions is defined in the ECI as neurological conditions other than dementia, seizures and epilepsy, or neurological disorders affecting movement.

<sup>4</sup>The SLE-related comorbidities were adapted from Ward MM. *J Rheumatol.* 2000;27(6):1408-1413.

<sup>5</sup>Cardiovascular disease is inclusive of cerebrovascular disease and myocardial infarction, as well as other cardiovascular-related conditions.

<sup>6</sup>Oral corticosteroid dosing was measured in prednisone-equivalent doses
